# The respiratory microbiome and susceptibility to influenza virus infection

Kyu Han Lee<sup>1</sup>, Aubree Gordon<sup>1</sup>, Kerby Shedden<sup>2,3</sup>, Guillermina Kuan<sup>4,5</sup>, Sophia Ng<sup>1</sup>, Angel  
Balmaseda<sup>5,6</sup> & Betsy Foxman<sup>1\*</sup>

<sup>1</sup> Department of Epidemiology, School of Public Health, University of Michigan, Ann Arbor,  
Michigan, United States of America

<sup>2</sup> Department of Biostatistics, School of Public Health, University of Michigan, Ann Arbor,  
Michigan, United States of America

<sup>3</sup> Department of Statistics, University of Michigan, Ann Arbor, Michigan, United States of  
America

<sup>4</sup> Centro de Salud Sócrates Flores Vivas, Ministry of Health, Managua, Nicaragua.

<sup>5</sup> Sustainable Sciences Institute, Managua, Nicaragua.

<sup>6</sup> National Virology Laboratory, Centro Nacional de Diagnóstico y Referencia, Ministry of Health,  
Nicaragua

\*Corresponding author

E-mail: [bfoxman@umich.edu](mailto:bfoxman@umich.edu) (BF)

Word Count: Abstract 275/300; Author Summary: 167/200; Main: 4,429

## Abstract

Influenza is a major cause of morbidity and mortality worldwide. However, vaccine effectiveness has been low to moderate in recent years and vaccine coverage remains low, especially in low- and middle-income countries. Supplementary methods of prevention should be explored to reduce the high burden of influenza.

A potential target is the respiratory tract microbiome, complex microbial communities which envelop the respiratory epithelium and play an important role in shaping host immunity. Using a household transmission study, we examined whether the nose/throat microbiota was associated with influenza susceptibility among participants exposed to influenza virus in the household. Further, we characterized changes in the nose/throat microbiota to explore whether community stability was influenced by influenza virus infection.

Using a generalized linear mixed effects model, we found a bacterial community type associated with decreased susceptibility to influenza. The community type was rare and transitory among young children but a prevalent and stable community type among adults. Using boosting and linear mixed effects models, we found associations between the nose/throat microbiota and influenza also existed at the taxa level, specifically with the relative abundance of *Alloprevotella*, *Prevotella*, and *Bacteroides* oligotypes.

We found high rates of change in the bacterial community among both secondary cases and household contacts who were not infected during follow up. Preliminary results suggest short-term changes in the bacterial community structure may differ between the two groups, but further work is needed to validate our observations.

Lastly, age was strongly associated with susceptibility to influenza and the nose/throat bacterial community structure. Although additional studies are needed to determine causality, our

results suggest the nose/throat microbiome may be a potential target for reducing the burden of influenza.

## Author summary

Microbiome research has transformed our understanding of microbes and human health. Resident bacteria can protect the host from pathogens by shaping immunological responses. These new insights suggest the microbiome could be a target for preventing influenza virus infection, a major cause of illness and death worldwide. In this study, we explored the relationship between the nose/throat microbiota and influenza virus in Nicaraguan households.

Household members were enrolled immediately after one member was diagnosed with influenza virus infection. This study design allowed us to identify associations between the microbiota and influenza susceptibility. We also explored whether influenza virus infection altered the bacterial community structure and found short-term changes were common among both secondary cases and household members who remained influenza negative during follow up. Lastly, we found age played major roles in both influenza susceptibility and in short-term changes in the microbiota. Although much work is needed to determine causal relationships, our findings suggest strategies that appropriately modify the microbiome might be useful in preventing influenza virus infections.

## Introduction

Influenza is a major contributor of human illness and death worldwide, estimated to cause 3-5 million cases of severe illness [1] and 400,000 deaths during interpandemic years [2]. Vaccination is the best available means of influenza prevention. However, vaccine effectiveness

has been low to moderate in recent years [3,4] and vaccine coverage remains low, especially in low- and middle-income countries [5]. With increasing support for a role of the microbiome in shaping host immunity [6–8], exploring whether these effects extend to influenza risk could contribute to supplementary methods of prevention.

We hypothesized that the nose/throat microbiome is an unrecognized factor associated with susceptibility to influenza virus. Murine and human studies support this assertion. Compared to controls, mice treated with oral antibiotics exhibited enhanced degeneration of the bronchiole epithelial layer and increased risk of death following intranasal infection with influenza virus [7]. In two separate randomized controlled trials, newborns fed prebiotics and probiotics had significantly lower incidence of respiratory tract infections compared to placebo [9,10]. These studies suggest the manipulation of the microbiome, either through disruption or supplementation, can alter risk of respiratory tract infections.

The epithelial cells of the upper and lower respiratory tracts are the primary targets for influenza virus infection and replication [11]. However, these cells are enveloped by complex bacterial communities that may directly or indirectly interact with influenza virus to mediate risk of infection. Commensal bacteria may prevent infection by regulating innate and adaptive host immune responses [6,7]. In addition, this immune response might stimulate changes in the microbiome [12–14]. In a human experimental trial, young adults given intranasal administration of live attenuated influenza vaccine were characterized by increased taxa richness relative to the control group [15].

Further, influenza-related changes in the bacterial community structure might explain the enhanced risk of bacterial pneumonia and otitis media following influenza virus infection [16–19]. The most commonly detected causative organisms of bacterial pneumonia and otitis media

increase in abundance in the upper respiratory tract following respiratory virus infection [20,21]. We previously showed that adults in the US with influenza virus infection expressed increased nose/throat carriage of *Streptococcus pneumoniae* and *Staphylococcus aureus* [20]. Similarly, other studies have observed an increase in pneumococcal density following rhinovirus infection [21] and changes in the microbiota during rhinovirus and respiratory syncytial virus infections [22]. Increased carriage elevates risk of invasive disease [23,24], potentially through more frequent microaspiration into the lung or migration to the middle ear [25]. However, an association between the nose/throat microbiome and influenza risk has not been demonstrated in human populations.

In this study, we used data from a longitudinal household transmission study of influenza to assess the relationship between the nose/throat microbiota and susceptibility to influenza virus infection and to determine whether influenza virus infection alters the bacterial community structure using an untargeted 16S rRNA taxonomic screen (Fig 1).

## Results

### Study population

A total of 717 participants from 144 households were enrolled in the Nicaraguan Household Transmission Study during 2012-2014. During this period, 3,101 nose/throat samples were collected over 5 home visits (mean: 4.3 samples per person; interquartile range (IQR): 4-5). Analysis was restricted to 537 household contacts who were negative for influenza virus by real-time reverse transcription polymerase chain reaction (RT-PCR) at time of enrollment.

Sixty-one household contacts were children  $\leq 5$  years of age (median: 2 years; IQR: 1-4), 163 were children 6-17 years of age (median: 10 years; IQR: 8-14), and 313 were adults (median: 33 years; IQR: 24-43) (Table 1). Fifty-one percent of all household contacts were exposed to at

least one tobacco smoker in the household and 29% resided in crowded households (on average, >3 persons per bedroom). Household contacts were rarely vaccinated against influenza (5%) and very few used antibiotics (<1% two weeks prior to enrollment and <1% during follow up) or oseltamivir (6% during follow up).

**Table 1. Characteristics of 537 household contacts of influenza cases from 144 households, Managua, Nicaragua, 2012-2014, by community type\* at enrollment.**

| Characteristic                          | All (n=537 <sup>†</sup> ) | Community Type 1 (n=132) | Community Type 2 (n=125) | Community Type 3 (n=122) | Community Type 4 (n=85) | Community Type 5 (n=59) |
|-----------------------------------------|---------------------------|--------------------------|--------------------------|--------------------------|-------------------------|-------------------------|
|                                         | No. (%)                   | No. (%)                  | No. (%)                  | No. (%)                  | No. (%)                 | No. (%)                 |
| Age (years)                             |                           |                          |                          |                          |                         |                         |
| 0-5                                     | 61 (11)                   | 9 (7)                    | 15 (12)                  | 4 (3)                    | 3 (4)                   | 26 (44)                 |
| 6-17                                    | 163 (30)                  | 51 (39)                  | 41 (33)                  | 38 (31)                  | 19 (22)                 | 9 (15)                  |
| ≥18                                     | 313 (58)                  | 72 (55)                  | 69 (55)                  | 80 (66)                  | 63 (74)                 | 24 (41)                 |
| Female                                  | 347 (65)                  | 86 (65)                  | 88 (70)                  | 87 (71)                  | 45 (53)                 | 35 (59)                 |
| Influenza infection                     | 71 (13)                   | 21 (16)                  | 20 (16)                  | 15 (12)                  | 5 (6)                   | 6 (10)                  |
| Influenza vaccination <sup>‡</sup>      | 27 (5)                    | 8 (6)                    | 6 (5)                    | 8 (7)                    | 2 (3)                   | 3 (5)                   |
| Smoker in household                     | 245 (51)                  | 54 (46)                  | 58 (52)                  | 56 (51)                  | 44 (59)                 | 28 (50)                 |
| >3 persons per bedroom in the household | 156 (29)                  | 40 (30)                  | 35 (28)                  | 36 (30)                  | 22 (26)                 | 19 (32)                 |
| Antibiotic use <2 weeks prior           | 1 (0)                     | 0 (0)                    | 0 (0)                    | 0 (0)                    | 0 (0)                   | 1 (2)                   |
| Antibiotic use during follow up         | 4 (1)                     | 2 (2)                    | 0 (0)                    | 1 (1)                    | 0 (0)                   | 1 (2)                   |
| Oseltamivir use during follow up        | 33 (6)                    | 4 (3)                    | 14 (11)                  | 6 (5)                    | 3 (4)                   | 5 (8)                   |

\*Community types were defined using Dirichlet multinomial mixture method (see Methods).

<sup>†</sup>Includes 10 household contacts with undefined community type at time of enrollment

<sup>‡</sup>Prior to enrollment and in same year as index case

After the enrollment of an index case, households were followed for up to 13 days through 5 home visits conducted at 2-3 day intervals. Seventy-one secondary cases from 48 households were identified by RT-PCR during follow up. Fourteen out of the 48 households had more than one secondary case (29%), suggesting clustering of cases by household. Most secondary cases

were older children and young adults (median: 13.0 years; IQR: 6, 23) and had at least one symptom of an acute respiratory infection during follow up (79%) (S1 Table).

### **Bacterial community types**

We conducted 16S (V4) rRNA sequencing on a pair of samples from each study participant: 712 samples collected at enrollment and 698 samples collected at the last available home visit. The median time between samples was 9 days (IQR: 9-10 days). After quality filtering, microbiota data was available for 710 samples collected at enrollment and 695 samples collected at the last available home visit.

Dirichlet multinomial mixture modeling [26], an unsupervised clustering method, was used to assign nose/throat samples to 5 bacterial community types (S1 Fig: model fit by Dirichlet components; S2 Fig: PCoA plot by community type). Ninety-eight percent of all sequenced samples were assigned to a community type, after applying a  $\geq 80\%$  posterior probability threshold. Permutational multivariate analysis of variance (PERMANOVA) indicated community types differed significantly from one another (Bray-Curtis dissimilarity,  $p=0.001$ ,  $R^2=0.21$ ). Relatively few oligotypes explained clustering of the single-community type model for the five-community type model, as 50% of the difference between models was attributed to 15 of the 230 total oligotypes. The relative abundances of these 15 oligotypes are depicted in Fig 2. The relative abundances of all 230 oligotypes are available in S2 Table.

The prevalence of community types among household contacts differed significantly by age. Most notably, community type 4 was rare among young children and became more prevalent with age (at enrollment; 0-5 years: 5%, 6-17 year: 12%, adults: 20%;  $\chi^2$ -test,  $p=0.004$ ) (Table 1). We observed similar results after restricting our analysis to household contacts who remained

influenza negative during follow up (at enrollment; 0-5 years: 7%, 6-17 years: 12%, adults: 21%;  $\chi^2$  test,  $p=0.011$ ) (S3 Table). Young children were primarily colonized by community type 5, which was less common among older age groups (at enrollment 0-5 years: 43%, 6-17 years: 6%, adults: 8%;  $\chi^2$ -test,  $p<0.001$ ) (Table 1). These results indicate age is strongly associated with the nose/throat bacterial community structure.

### **Bacterial community type associated with lower susceptibility to influenza virus infection**

To investigate the relationship between bacterial community types and influenza susceptibility, we first estimated secondary attack rates by community type. Secondary attack rates were calculated as: the number of secondary cases identified by RT-PCR during follow up over the total number of household contacts at start of follow up. Secondary attack rates among household contacts with community type 4 were nearly half of other community types; however, differences were not statistically significant (5.9% vs. 10.2%-16.0%;  $\chi^2$ -test,  $p=0.056$ ) (Fig 3). Similar differences were observed after stratifying by age.

We used a generalized linear mixed effects model to examine the relationship between community types and influenza susceptibility after adjusting for age, a smoker in the household, household crowding, and clustering by household. A detailed description of the model is available in S1 Appendix. Our decision to account for household clustering was supported by an intra-class correlation of 0.21, which indicates 21% of the total variance was due to clustering by household. We found household contacts with community type 4 had a lower odds of influenza virus infection (odds ratio (OR): 0.26; 95% CI: 0.07, 0.99) (Fig 4). Further, young children were most likely to acquire influenza virus (OR: 4.66; 95% CI: 1.62, 13.37), followed by older children (OR: 2.91; 95% CI: 1.47, 5.80). These results suggest household contacts with community type 4 were less



likely to be infected with influenza and younger household contacts were at greater risk after adjusting for other known risk factors.

We were inadequately powered for influenza type/subtype-specific models; however, no household contacts with community type 4 at enrollment (n=85) were infected with H3N2, the most commonly identified influenza subtype in this population (52% of all secondary cases). This suggests associations between the microbiota and influenza susceptibility may vary by subtype but further work is needed to test this hypothesis.

### **Oligotypes associated with susceptibility to influenza virus infection**

In addition to analysis at the community type level, taxa-specific analysis was conducted using MaAsLin [27]. MaAsLin first uses boosting in a univariate pre-screen to identify taxa and metadata (features) that are potentially associated. Significantly associated features are then identified using linear mixed effects models. Models included in our analysis adjusted for age, a smoker in the household, household crowding, and clustering by household (S1 Appendix). Two oligotypes, *Alloprevotella* sp. and *Prevotella histicola* / sp. / *veroralis* / *fusca* / *scopos* / *melaninogenica*, were positively associated with influenza virus infection (S4 Table). One oligotype was negatively associated with influenza virus infection. Although unclassified in the HOMD database, a nblast search using the GenBank database (<https://www.ncbi.nlm.nih.gov/genbank/>) classified the oligotype as *Bacteroides vulgatus*.

The relative abundance of multiple oligotypes were strongly associated with age. Relative to adults, 119 oligotypes were differentially abundant among young children and 41 oligotypes were differentially abundant among older children. Lastly, four oligotypes were associated with

household crowding and no oligotype was associated with exposure to a smoker in the household.  
All statistically significant associations are listed in S4 Table.

## **Community diversity and influenza virus infection**

We examined whether community diversity was associated with influenza susceptibility. Shannon diversity was significantly different between community type 4 and other community types (Wilcoxon rank-sum tests, all comparisons  $p < 0.001$ ) (S3 Fig). Community type 4 (median: 3.43) was less diverse than community type 1 (median: 3.58) and more diverse than community types 2, 3, and 5 (medians: 2.56-3.29).

To further explore whether community diversity influenced the relationship between community types and influenza susceptibility, we reran our generalized linear mixed effects model using Shannon diversity as our primary predictor. Alpha diversity was not significantly associated with influenza susceptibility (OR: 1.76; 95% CI: 0.83, 3.72) (S4 Fig).

## **Stability of bacterial community structure during influenza virus infection**

To examine the stability of the respiratory microbiota during influenza virus infection, we characterized changes in the bacterial community structure over a median of 9 days (IQR: 9, 10). We used Markov chain plots to represent short-term changes in the nose/throat microbiota among household contacts, by influenza case status and age (Fig 5 and S2 Appendix). Circles represent community types 1 through 5 and the size of the circles represent the prevalence of each community type at start of follow up. Arrows represent transitions between community types during follow up. The width and number assigned to each arrow represents the proportion of

individuals who transitioned between community types. Community stability was estimated as the proportion of household contacts who showed no change in community type over follow up.

Although the prevalence of community types appeared to remain similar between the two sampling points (S3 Table), we found transitions between community types were common with approximately half of all household contacts (45% among secondary cases, 55% among uninfected) changing to a different community type by the end of follow up (Fig 5 and S2 Appendix). Stability ranged from 40-62% for all community types in both secondary cases and uninfected household contacts. Although we were inadequately powered to test for statistical differences in specific type-to-type transitions, the overall contrast between the two groups suggest community dynamics may differ by influenza status and should be explored further.

We specifically focused on the stability of community type 4, which was associated with decreased influenza susceptibility. Stability among uninfected household contacts with community type 4 increased with age (0-5 years: 0%, 6-17 years: 40%, adults: 70%; Fisher exact test,  $p=0.016$ ) (Fig 5B). We were inadequately powered for a similar analysis among secondary cases.

We used a generalized linear mixed effects model to examine whether community stability was associated with influenza virus infection, after adjusting for community type at enrollment, age, a smoker in the household, household crowding, and clustering by household (S1 Appendix). We did not find an association between community stability and influenza virus infection. However, we found stability was lowest among children 6-17 years old (OR: 1.67; 95% CI: 1.07, 2.60) (Fig 6).

## Sensitivity Analysis

Sensitivity analysis was conducted to investigate potential sources of bias (S3 Appendix). To assess whether sequencing depth could influence our results, we first examined whether sequencing depth differed by community type. We found no meaningful differences in sequencing depth by community type. In addition, we reran our influenza susceptibility model with sequencing depth as an additional predictor. We found only minor differences in model estimates, with a slightly enhanced effect of community type 4 (OR: 0.24; 95% CI: 0.06, 0.94).

To assess whether time between samples influenced community stability, we additionally controlled for time between samples in our community stability model. We found only minor differences in model estimates.

Lastly, we explored whether a more conservative criterion for community type assignments would influence our results. We reran our influenza susceptibility model after assigning samples with a maximum posterior probability  $\leq 90\%$  as missing. We found minor differences in our results. However, the association with community type 4 was no longer statistically significant (OR: 0.27; 95% CI: 0.07, 1.03).

## Discussion

To our knowledge, this is the first human population study to prospectively explore the relationship between the nose/throat microbiome and influenza virus infection. We demonstrate influenza susceptibility is associated with both differences in the overall bacterial community structure and in the relative abundance of specific taxa. Although the exact biological mechanisms remain unclear, the few murine studies that have examined this relationship suggest it is likely mediated by immunomodulation. In these studies, mice treated with antibiotics exhibited diminished innate and adaptive immune responses compared to placebo. Specifically, mice with

disrupted microbiomes expressed impaired macrophage responses to type I and type II interferons and a lack of bacterial lipopolysaccharides that stimulate Toll-like receptors and other pattern recognition receptors [6,7]. Although these mechanisms suggest a causal relationship between the respiratory microbiome and influenza virus infection, additional work is needed to evaluate whether epidemiologic associations in human populations represent a true effect of the microbiome or merely reflect differences in host immunity. Further, future studies should examine whether the relationship differs by influenza type/subtype.

Most studies that have characterized the upper respiratory tract microbiota are limited to infants [22,28,29]. Here, we examine a unique population consisting of both children and adults. We demonstrate age is strongly associated with both the prevalence and stability of nose/throat bacterial communities. Most notably, we found the community type associated with decreased susceptibility to influenza was less prevalent and less stable among young children. If a causal relationship between the microbiome and influenza truly exists, our results would suggest the microbiome may contribute to the increased influenza risk observed among young children [30].

We found the microbiome structure changed frequently among both influenza cases and household contacts who remained uninfected during follow up (median: 9.0 days, IQR: 9.0-10.0). This was expected among influenza cases as prior studies have demonstrated increased colonization by opportunistic pathogens in the upper respiratory tract following respiratory virus infection [20,21]. However, the high degree of change among uninfected household contacts was surprising and may represent a response to influenza exposure in the household.

Preliminary findings from our Markov chain analysis suggest community dynamics may differ by influenza status. Characterizing multiple longitudinal samples per participant would lead to a better understand of influenza and its impact on the microbiome. In addition, future studies

should explore whether changes in the bacterial community structure are directly due to influenza virus or indirect responses to changes in the virome or mycobiome.

A limitation in our study is the use of pooled nose and throat samples. Differential sampling by site can introduce bias if sampling is related to both the observed bacterial community structure and influenza susceptibility. Although this was minimized through consistent sampling techniques across all study participants, factors such as age could confound associations and may partially explain age-related differences in the bacterial community structure. We attempted to reduce potential bias by adjusting age and other potential confounders in our analysis. A second limitation is the use of RT-PCR for identifying influenza cases. Individuals can be infected with influenza virus (i.e.  $\geq 4$ -fold increase in hemagglutinin inhibition antibody titer) and not shed virus [31]. We may have missed true index cases and secondary cases with low levels of virus. Although our results and conclusions are limited to secondary cases with viral shedding, RT-PCR allowed us to screen for secondary cases at 2-3 day intervals while limiting invasive procedures. Lastly, we did not consider pre-existing immunity from previous infections, which might potentially confound or modify associations.

While much work is needed to translate these results into potential clinical and public health applications, our findings contribute to a growing literature suggesting that it may be possible to manipulate the microbiome and decrease risk of disease [9,10]. Influenza virus is a major cause of severe illness and death each year [1,2]. However, vaccine effectiveness varies by year [4] and there still much debate on the use of antivirals for prophylaxis, especially for preventing asymptomatic infections and influenza transmission [32]. Our study suggests the microbiome should be further explored as a potential target in reducing influenza risk.

## Methods

### Study population and sample collection

The Nicaraguan Household Transmission Study of Influenza is an ongoing prospective case-ascertained study conducted among urban households in Managua, Nicaragua. Patients attending the Health Center Sócrates Flores Vivas were screened for study eligibility. Index cases of influenza were identified as patients with a positive QuickVue Influenza A+B rapid test, symptom onset of an acute respiratory infection within the past 48 hours, and living with at least one other household member. Symptoms of acute respiratory infection included fever or feverishness with cough, sore throat, or runny nose.

Index cases and household members (contacts) were invited to participate and clinical, sociodemographic, and household data were collected at time of enrollment. Participants were followed for up to 13 days through 5 home visits conducted at 2-3 day intervals. At each home visit, oropharyngeal and nasal swabs were collected, combined, and stored at 4°C in viral transport media. All samples were transported to the National Virology Laboratory at the Nicaraguan Ministry of Health within 48 hours of collection and stored at -80°C. A symptom diary was collected for all participants during follow up.

A total of 168 households were enrolled for follow up during 2012-2014. Households were excluded from analysis if a suspected index case was negative for influenza virus by real-time reverse-transcription polymerase chain reaction (RT-PCR) at time of enrollment. Two household contacts were excluded from analysis due to missing influenza virus infection status at time of enrollment. The remaining participants consisted of 144 index cases of influenza positive by RT-PCR, 537 household contacts influenza negative by RT-PCR at time of enrollment, and 36 household contacts who were RT-PCR positive for influenza virus on the first day of follow up.

## **Ethics statement**

Written informed consent was obtained from adult participants and from parents or legal guardians of participants under 18 years of age. In addition, verbal assent was obtained from children over 5 years of age. The study was approved by Institutional Review Boards at the University of Michigan, the Nicaraguan Ministry of Health, and the University of California at Berkeley.

## **RNA extraction and RT-PCR**

Total RNA was extracted from all available nasal/oropharyngeal samples using the QIAmp Viral Mini Kit (QIAGEN, Hilden, Germany) per manufacturer's instructions at the National Virology Laboratory in Nicaragua. Samples were tested for influenza virus by RT-PCR using standard protocols validated by the Centers for Disease Control and Prevention [33].

## **DNA extraction and 16S rRNA sequencing**

Total DNA was extracted from a pair of samples from each study participant: the first sample collected at time of enrollment and the second sample collected at the last day of follow up (median days between samples: 9.0 days, IQR: 9.0-10.0). Among the 717 total study participants, five first samples and 19 second samples were not available for DNA extraction. DNA was extracted using the QIAmp DNA Mini Kit and an enzyme cocktail composed of cell lysis solution (Promega, Madison, USA), lysozyme, mutanolysin, RNase A, and lysostaphin (Sigma-Aldrich, St. Louis, USA) in 22.5:4.5:1.125:1.125:1 parts, respectively. 100  $\mu$ L of sample was incubated at 37°C for 30 minutes with 80  $\mu$ L of the enzyme cocktail. After adding 25  $\mu$ L proteinase



K and 200  $\mu$ L of Buffer AL, samples were vortexed and incubated at 56°C for 30 minutes. Samples were washed with 200  $\mu$ L of 100% ethanol, 500  $\mu$ L of Buffer AW1, and then 500  $\mu$ L of Buffer AW2. To maximize DNA yield, DNA was eluted twice with 100  $\mu$ L of Buffer AE and stored at -80°C.

The V4 hypervariable region of the 16S rRNA gene was amplified and sequenced at the University of Michigan Microbial Systems Laboratories using Illumina MiSeq V2 chemistry 2x250 (Illumina, San Diego, CA) and a validated dual-indexing method [34]. Briefly, primers consisted of an Illumina adapter, an 8-nt index sequence, a 10-nt pad sequence, a 2-nt linker, and the V4-specific F515/R806 primer [35]. Amplicons were purified and pooled in equimolar concentrations. A mock community of 21 species (Catalog No. HM-782D, BEI Resources, Manassas, VA) or a mock community of 10 species (Catalog No. D6300, Zymo Research, Irvine, CA) was included by the Microbial Systems Laboratories to assess sequencing error rates. For every 96-well plate submitted for amplification and sequencing (90 study samples), we included two aliquots of an in-house mock community consisting of *Streptococcus pneumoniae*, *Streptococcus pyogenes*, *Staphylococcus aureus*, *Haemophilus influenzae*, and *Moraxella catarrhalis* and two aliquots of an oropharyngeal control sample. These internal controls were randomly assigned to plate wells and used to assess systematic variation in sequencing. All samples were sequenced in duplicate, demultiplexed, and quality filtered.

### **Oligotyping and community typing**

We used mothur v1.38.1 [36] to align and perform quality filtering on raw sequences using the mothur standard operating procedures ([https://www.mothur.org/wiki/MiSeq\\_SOP](https://www.mothur.org/wiki/MiSeq_SOP), accessed November 18, 2016). Sequences were converted to the appropriate oligotyping format as

previously described [37]. We used the Minimum Entropy Decomposition (MED) algorithm [38] with default parameters (-M: 13779.0, -V: 3 nt) to cluster sequences into oligotypes. Briefly, the algorithm identifies variable nucleotide positions and uses Shannon entropy to partition sequences into nodes. The process is iterative and continues to decompose parent nodes into child nodes until there are no discernable entropy peaks. Oligotyping has previously been used to examine within-genus variations in the microbiota [37,39–41] and provides increased resolution relative to conventional distance-based clustering methods.

After excluding five samples with less than 1,000 reads, our dataset consisted of 1,405 samples with a total of 61,784,957 sequences decomposed into 230 oligotypes. To assign taxonomy, we searched representative sequences of each oligotype against the Human Oral Microbiome Database (HOMD) v14.51 [42] using blastn v2.2.23 [43]. Classifications with  $\geq 98\%$  identity were kept.

We used Dirichlet multinomial mixture models [26] in R v3.4.4 [44] and the DirichletMultinomial v1.16.0 package [45] to assign all samples to 5 community types. We determined the number of community types by comparing the Laplace approximation of the negative log models and identifying the point at which an increase in Dirichlet components resulted in minor reductions in model fit (S1 Fig). This approach allowed us to consider both model fit of the negative log models and statistical power in downstream analysis. The goal was not to identify the “true communities”, as community types are representations of data. All formal statistical inferences are based on the models relating community types to our outcomes of interest, with any findings being statistically supported by the data.

Samples were assigned to community types with the greatest posterior probability. 98.2% of all samples had a posterior probability of 80% or higher. To minimize misclassification, samples

were assigned as having an undefined community type if the posterior probability was less than 80%. Each community type contained between 13.0-24.8% of all samples (n=182-348) and 1.8% of all samples (n=25) were undefined.

## Statistical Models

Detail to statistical models used in this study are described in S1 Appendix. To examine the association between community types at enrollment and susceptibility of influenza virus infection, we used a generalized linear mixed effects model estimating the odds of infection after adjusting for community type (relative to community type 1), age (relative to adults), a smoker in the household, household crowding, and clustering by household. Household crowding was defined as having, on average, more than three household members per bedroom. The model was adapted to examine the effects of alpha diversity.

Associations between individual oligotypes and participant data were determined using MaAsLin [27]. Briefly, MaAsLin is a sparse multivariate approach used to identify associations between individual taxa and participant data. Relative abundance values were arcsine square-root transformed to stabilize variance. Potentially associated features (i.e. oligotypes) were selected using boosting in a univariate prescreen. Linear mixed effects models are then used to find associations between the selected features and metadata. The Benjamin-Hochberg method was used to correct for multiple testing. Associations with a q-value <0.05 were considered statistically significant.

To examine the effect of influenza virus infection on community stability, we used a generalized linear mixed effects model estimating the odds of any change in community type over follow up, after adjusting for community type at enrollment (relative to community type 1), age

(relative to adults), a smoker in the household, household crowding (average of >3 persons per bedroom), and clustering by household. All statistical analysis was conducted using R v3.4.4 [44] and the lme4, vegan, and maaslin packages [27,46,47].

## **Markov chain analysis**

We estimated community transition rates over time using methods described previously [48]. Briefly, we restricted our dataset to household contacts with complete nose/throat sample pairs (i.e. microbiota data at enrollment and at follow up). Community transition rates were calculated as Markov chain probabilities. Analysis was repeated after stratifying by influenza status and age.

## **Acknowledgments**

We are grateful to the participants and our collaborators at the Nicaraguan Ministry of Health and Sustainable Sciences Institute for data collection, data management, and laboratory work. We thank Roger Lopez for conducting RT-PCR. We also thank the University of Michigan Microbial Systems Laboratories for 16S sequencing and Nielson Baxter, Michelle Berry, and Ruben Props for technical assistance in mothur and oligotyping. We thank Anna Gencay and Sarah McColm for laboratory assistance. We appreciate feedback we received throughout the course of the study from Carl Marrs, Alex Rickard, Rachel Gicquelais, Kirtana Ramadugu, Freida Bolstein, Emily Menard, and our MAC-EPID colleagues. We thank Marie Griffin and Jae Shin for reviewing an earlier version of this manuscript. We are entirely grateful for all the study participants in the Nicaraguan Transmission Study of Influenza.

## References

1. World Health Organization. Influenza. In: Immunization, vaccines and biologicals: influenza [Internet]. [cited 17 Feb 2017]. Available: <http://www.who.int/immunization/topics/influenza/en/>
2. Iuliano AD, Roguski KM, Chang HH, Muscatello DJ, Palekar R, Tempia S, et al. Estimates of global seasonal influenza-associated respiratory mortality: a modelling study. *The Lancet*. 2017;0. doi:10.1016/S0140-6736(17)33293-2
3. Paules CI, Sullivan SG, Subbarao K, Fauci AS. Chasing Seasonal Influenza — The Need for a Universal Influenza Vaccine. *N Engl J Med*. 2018;378: 7–9. doi:10.1056/NEJMp1714916
4. Belongia EA, Simpson MD, King JP, Sundaram ME, Kelley NS, Osterholm MT, et al. Variable influenza vaccine effectiveness by subtype: a systematic review and meta-analysis of test-negative design studies. *Lancet Infect Dis*. 2016;16: 942–951. doi:10.1016/S1473-3099(16)00129-8
5. WHO Global Influenza Programme. Seasonal Influenza Vaccine Use in Low and Middle Income Countries in the Tropics and Subtropics. A systematic review. [Internet]. Geneva, Switzerland: World Health Organization; 2015 Jan. Available: [http://apps.who.int/iris/bitstream/10665/188785/1/9789241565097\\_eng.pdf](http://apps.who.int/iris/bitstream/10665/188785/1/9789241565097_eng.pdf)
6. Ichinohe T, Pang IK, Kumamoto Y, Peaper DR, Ho JH, Murray TS, et al. Microbiota regulates immune defense against respiratory tract influenza A virus infection. *Proc Natl Acad Sci U S A*. 2011;108: 5354. doi:10.1073/pnas.1019378108

- 470 7. Abt MC, Osborne LC, Monticelli LA, Doering TA, Alenghat T, Sonnenberg GF, et al.  
471 Commensal bacteria calibrate the activation threshold of innate antiviral immunity.  
472 Immunity. 2012;37: 158–170. doi:10.1016/j.immuni.2012.04.011
- 473 8. Levy M, Blacher E, Elinav E. Microbiome, metabolites and host immunity. Curr Opin  
474 Microbiol. 2017;35: 8–15. doi:10.1016/j.mib.2016.10.003
- 475 9. Luoto R, Ruuskanen O, Waris M, Kalliomäki M, Salminen S, Isolauri E. Prebiotic and  
476 probiotic supplementation prevents rhinovirus infections in preterm infants: A randomized,  
477 placebo-controlled trial. J Allergy Clin Immunol. 2014;133: 405–413.  
478 doi:10.1016/j.jaci.2013.08.020
- 479 10. Panigrahi P, Parida S, Nanda NC, Satpathy R, Pradhan L, Chandel DS, et al. A randomized  
480 synbiotic trial to prevent sepsis among infants in rural India. Nature. 2017;advance online  
481 publication. doi:10.1038/nature23480
- 482 11. Russell RJ, Gamblin SJ, Skehel JJ. Influenza glycoproteins: hemagglutinin and  
483 neuraminidase. In: Webster RG, Monto AS, Braciale TJ, Lamb RA, editors. Textbook of  
484 Influenza. 2nd ed. Wiley; 2013.
- 485 12. Lee KH, Gordon A, Foxman B. The role of respiratory viruses in the etiology of bacterial  
486 pneumonia: An ecological perspective. Evol Med Public Health. 2016;2016: 95–109.  
487 doi:10.1093/emph/eow007
- 488 13. de Steenhuijsen Piters WAA, Heinonen S, Hasrat R, Bunsow E, Smith B, Suarez-Arrabal M-  
489 C, et al. Nasopharyngeal Microbiota, Host Transcriptome, and Disease Severity in Children

- with Respiratory Syncytial Virus Infection. *Am J Respir Crit Care Med*. 2016;194: 1104–1115. doi:10.1164/rccm.201602-0220OC
14. Lynch SV. Viruses and Microbiome Alterations. *Ann Am Thorac Soc*. 2014;11: S57–S60. doi:10.1513/AnnalsATS.201306-158MG
15. Salk HM, Simon WL, Lambert ND, Kennedy RB, Grill DE, Kabat BF, et al. Taxa of the Nasal Microbiome Are Associated with Influenza-Specific IgA Response to Live Attenuated Influenza Vaccine. *PloS One*. 2016;11: e0162803. doi:10.1371/journal.pone.0162803
16. Wolter N, Tempia S, Cohen C, Madhi SA, Venter M, Moyes J, et al. High Nasopharyngeal Pneumococcal Density, Increased by Viral Coinfection, Is Associated With Invasive Pneumococcal Pneumonia. *J Infect Dis*. 2014;210: 1649–1657. doi:10.1093/infdis/jiu326
17. Shrestha S, Foxman B, Weinberger DM, Steiner C, Viboud C, Rohani P. Identifying the Interaction Between Influenza and Pneumococcal Pneumonia Using Incidence Data. *Sci Transl Med*. 2013;5: 191ra84-191ra84. doi:10.1126/scitranslmed.3005982
18. Vesa S, Kleemola M, Blomqvist S, Takala A, Kilpi T, Hovi T. Epidemiology of documented viral respiratory infections and acute otitis media in a cohort of children followed from two to twenty-four months of age. *Pediatr Infect Dis J*. 2001;20: 574–581.
19. Morens DM, Taubenberger JK, Fauci AS. Predominant Role of Bacterial Pneumonia as a Cause of Death in Pandemic Influenza: Implications for Pandemic Influenza Preparedness. *J Infect Dis*. 2008;198: 962–970. doi:10.1086/591708

- 509 20. de Lastours V, Malosh R, Ramadugu K, Srinivasan U, Dawid S, Ohmit S, et al. Co-  
510 colonization by *Streptococcus pneumoniae* and *Staphylococcus aureus* in the throat during  
511 acute respiratory illnesses. *Epidemiol Infect.* 2016; 1–13. doi:10.1017/S0950268816001473
- 512 21. Fan RR, Howard LM, Griffin MR, Edwards KM, Zhu Y, Williams JV, et al. Nasopharyngeal  
513 Pneumococcal Density and Evolution of Acute Respiratory Illnesses in Young Children,  
514 Peru, 2009–2011. *Emerg Infect Dis.* 2016;22: 1996–1999. doi:10.3201/eid2211.160902
- 515 22. Rosas-Salazar C, Shilts MH, Tovchigrechko A, Schobel S, Chappell JD, Larkin EK, et al.  
516 Differences in the Nasopharyngeal Microbiome During Acute Respiratory Tract Infection  
517 With Human Rhinovirus and Respiratory Syncytial Virus in Infancy. *J Infect Dis.* 2016;214:  
518 1924–1928. doi:10.1093/infdis/jiw456
- 519 23. Bogaert D, De Groot R, Hermans PWM. *Streptococcus pneumoniae* colonisation: the key to  
520 pneumococcal disease. *Lancet Infect Dis.* 2004;4: 144–154. doi:10.1016/S1473-  
521 3099(04)00938-7
- 522 24. Wertheim HFL, Melles DC, Vos MC, van Leeuwen W, van Belkum A, Verbrugh HA, et al.  
523 The role of nasal carriage in *Staphylococcus aureus* infections. *Lancet Infect Dis.* 2005;5:  
524 751–762. doi:10.1016/S1473-3099(05)70295-4
- 525 25. Krone CL, van de Groep K, Trzciński K, Sanders EAM, Bogaert D. Immunosenescence and  
526 pneumococcal disease: an imbalance in host-pathogen interactions. *Lancet Respir Med.*  
527 2014;2: 141–153. doi:10.1016/S2213-2600(13)70165-6
- 528 26. Holmes I, Harris K, Quince C. Dirichlet multinomial mixtures: generative models for  
529 microbial metagenomics. *PloS One.* 2012;7: e30126. doi:10.1371/journal.pone.0030126



27. Morgan XC, Tickle TL, Sokol H, Gevers D, Devaney KL, Ward DV, et al. Dysfunction of the intestinal microbiome in inflammatory bowel disease and treatment. *Genome Biol.* 2012;13: R79. doi:10.1186/gb-2012-13-9-r79
28. Laufer AS, Metlay JP, Gent JF, Fennie KP, Kong Y, Pettigrew MM. Microbial communities of the upper respiratory tract and otitis media in children. *mBio.* 2011;2: e00245-00210. doi:10.1128/mBio.00245-10
29. Teo SM, Mok D, Pham K, Kusel M, Serralha M, Troy N, et al. The infant airway microbiome in health and disease impacts later asthma development. *Cell Host Microbe.* 2015;17: 704–715. doi:10.1016/j.chom.2015.03.008
30. Gordon A, Ortega O, Kuan G, Reingold A, Saborio S, Balmaseda A, et al. Prevalence and seasonality of influenza-like illness in children, Nicaragua, 2005-2007. *Emerg Infect Dis.* 2009;15: 408–414. doi:10.3201/eid1503.080238
31. Zambon M. Influenza surveillance and laboratory diagnosis. In: Webster RG, Monto AS, Braciale TJ, Lamb RA, editors. *Textbook of Influenza*. 2nd ed. Wiley; 2013.
32. Jefferson T, Jones M, Doshi P, Spencer EA, Onakpoya I, Heneghan CJ. Oseltamivir for influenza in adults and children: systematic review of clinical study reports and summary of regulatory comments. *BMJ.* 2014;348: g2545. doi:10.1136/bmj.g2545
33. Novel Swine-Origin Influenza A (H1N1) Virus Investigation Team, Dawood FS, Jain S, Finelli L, Shaw MW, Lindstrom S, et al. Emergence of a novel swine-origin influenza A (H1N1) virus in humans. *N Engl J Med.* 2009;360: 2605–2615. doi:10.1056/NEJMoa0903810

34. Kozich JJ, Westcott SL, Baxter NT, Highlander SK, Schloss PD. Development of a Dual-Index Sequencing Strategy and Curation Pipeline for Analyzing Amplicon Sequence Data on the MiSeq Illumina Sequencing Platform. *Appl Environ Microbiol.* 2013;79: 5112–5120. doi:10.1128/AEM.01043-13
35. Caporaso JG, Lauber CL, Walters WA, Berg-Lyons D, Lozupone CA, Turnbaugh PJ, et al. Global patterns of 16S rRNA diversity at a depth of millions of sequences per sample. *Proc Natl Acad Sci.* 2011;108: 4516–4522. doi:10.1073/pnas.1000080107
36. Schloss PD, Westcott SL, Ryabin T, Hall JR, Hartmann M, Hollister EB, et al. Introducing mothur: open-source, platform-independent, community-supported software for describing and comparing microbial communities. *Appl Environ Microbiol.* 2009;75: 7537–7541. doi:10.1128/AEM.01541-09
37. Berry MA, White JD, Davis TW, Jain S, Johengen TH, Dick GJ, et al. Are Oligotypes Meaningful Ecological and Phylogenetic Units? A Case Study of Microcystis in Freshwater Lakes. *Front Microbiol.* 2017;8: 365. doi:10.3389/fmicb.2017.00365
38. Eren AM, Morrison HG, Lescault PJ, Reveillaud J, Vineis JH, Sogin ML. Minimum entropy decomposition: unsupervised oligotyping for sensitive partitioning of high-throughput marker gene sequences. *ISME J.* 2015;9: 968–979. doi:10.1038/ismej.2014.195
39. Eren AM, Zozaya M, Taylor CM, Dowd SE, Martin DH, Ferris MJ. Exploring the Diversity of Gardnerella vaginalis in the Genitourinary Tract Microbiota of Monogamous Couples Through Subtle Nucleotide Variation. *PLOS ONE.* 2011;6: e26732. doi:10.1371/journal.pone.0026732

40. Eren AM, Borisy GG, Huse SM, Mark Welch JL. Oligotyping analysis of the human oral microbiome. *Proc Natl Acad Sci U S A*. 2014;111: E2875–E2884. doi:10.1073/pnas.1409644111
41. Eren AM, Sogin ML, Morrison HG, Vineis JH, Fisher JC, Newton RJ, et al. A single genus in the gut microbiome reflects host preference and specificity. *ISME J*. 2015;9: 90–100. doi:10.1038/ismej.2014.97
42. Chen T, Yu W-H, Izard J, Baranova OV, Lakshmanan A, Dewhirst FE. The Human Oral Microbiome Database: a web accessible resource for investigating oral microbe taxonomic and genomic information. *Database J Biol Databases Curation*. 2010;2010: baq013. doi:10.1093/database/baq013
43. Altschul SF, Gish W, Miller W, Myers EW, Lipman DJ. Basic local alignment search tool. *J Mol Biol*. 1990;215: 403–410. doi:10.1016/S0022-2836(05)80360-2
44. R Core Team. R: A language and environment for statistical computing [Internet]. Vienna, Austria: R Foundation for Statistical Computing; 2017. Available: <https://www.R-project.org/>
45. Morgan M. DirichletMultinomial: Dirichlet-Multinomial Mixture Model Machine Learning for Microbiome Data. 2017.
46. Bates D, Maechler M, Bolker B, Walker S. Fitting Linear Mixed-Effects Models Using lme4. *J Stat Softw*. 2015;67: 1–48. doi:10.18637/jss.v067.i01

- 591 47. Oksanen J, Blanchet FG, Friendly M, Kindt R, Legendre P, McGlinn D, et al. vegan:  
592 Community Ecology Package [Internet]. 2018. Available: [https://CRAN.R-](https://CRAN.R-project.org/package=vegan)  
593 [project.org/package=vegan](https://CRAN.R-project.org/package=vegan)
  
- 594 48. DiGiulio DB, Callahan BJ, McMurdie PJ, Costello EK, Lyell DJ, Robaczewska A, et al.  
595 Temporal and spatial variation of the human microbiota during pregnancy. Proc Natl Acad  
596 Sci U S A. 2015;112: 11060–11065. doi:10.1073/pnas.1502875112
  
- 597
- 598

**Fig 1. Graphical abstract.**

**Fig 2. Relative abundance of 15 oligotypes, by community type.**

Oligotypes included in the figure attributed >50% of the difference between the single-community type model and the five-community type model. Bars represent the mean relative abundance of each oligotype ( $\pm 1$  standard error). 1,405 samples from 717 study participants residing in 144 households in Managua, Nicaragua, 2012-2014.

**Fig 3. Secondary attack rates by community type at enrollment and age.**

533 household contacts of influenza cases with defined community type at enrollment, residing in 144 households in Managua, Nicaragua, 2012-2014. Numbers represent sample size of each group.

**Fig 4. Generalized linear mixed effects model estimating odds of influenza virus infection.**

Model adjusting for community type (relative to community type 1), age (relative to adults), a smoker in the household, household crowding (average of >3 persons per bedroom), and clustering by household. 468 household contacts of influenza cases with complete data, residing in 132 households in Managua, Nicaragua, 2012-2014.

**Fig 5. Stability of nose/throat bacterial community over follow up.**

513 household contacts with microbiota data both at enrollment and follow up, residing in 144 households in Managua, Nicaragua, 2012-2014. **(A)** By influenza case status. **(B)** By age, among 443 household contacts who remained negative for influenza virus infection during follow up. **(C)** By age, among 70 secondary cases. Circles represent community types and circle size is proportional to prevalence of community types at enrollment. Community type u corresponds to

samples with an undefined community type. Transition rates between community types were estimated as Markov chain probabilities and are shown numerically. Transitions rates  $<0.10$  were removed for simplicity. Complete data are available in S2 Appendix.

**Fig 6. Generalized linear mixed effects model estimating odds of change in community type during follow up.**

Model adjusting for influenza virus infection, community type at enrollment (relative to community type 1), age (relative to adults), a smoker in the household, household crowding (average of  $>3$  persons per bedroom), and clustering by household. 443 household contacts with defined community types at enrollment and follow up and complete data, residing in 130 households in Managua, Nicaragua, 2012-2014. Household contacts with an undefined community type were excluded from analysis.

**S1 Fig. Model fit of negative log models by number of Dirichlet components.**

We determined the number of community types by estimating the Laplace approximation of the negative log models and identifying the point at which an increase in Dirichlet components resulted in minor reductions in model fit. This approach allowed us to consider both model fit of the negative log models and statistical power in downstream analysis. The goal was not to identify the “true communities”, as community types are representations of data. All formal statistical inferences are based on the models relating community types to our outcomes of interest, with any findings being statistically supported by the data.

**S2 Fig. Principal coordinates analysis of nose/throat samples assigned to community types.**

1,405 nose/throat samples from 717 study participants residing in 144 households in Managua, Nicaragua, 2012-2014. Based on Bray-Curtis dissimilarity.

**S3 Fig. Shannon diversity of nose/throat samples, by bacterial community type.**

1,380 samples with defined community type, 717 study participants residing in 144 households in Managua, Nicaragua, 2012-2014.

**S4 Fig. Generalized linear mixed effects model estimating odds of influenza virus infection using Shannon diversity.**

Model adjusts for Shannon diversity, age (relative to adults), a smoker in the household, household crowding (average of >3 persons per bedroom), and clustering by household. 477 household contacts of influenza cases with complete data, residing in 132 households in Managua, Nicaragua, 2012-2014.

**S1 Table. Characteristics of 71 secondary cases from 48 households, Managua, Nicaragua, 2012-2014, by community type at enrollment.**

**S2 Table. Relative abundance of all 230 oligotypes, by community type.**

A total of 1,405 samples from 717 study participants residing in 144 households in Managua, Nicaragua, 2012-2014.

**S3 Table. Distribution of community types by age, time, and whether acquired influenza by end of follow up.**

669 537 household contacts with any microbiota data, residing in 144 households in Managua,  
670 Nicaragua, 2012-2014.

671

672 **S4 Table. MaAsLin results.**

673

674 **S1 Appendix. Description of statistical models.**

675

676 **S2 Appendix. Stability of nose/throat bacterial community over follow up, including all**  
677 **transitions.**

678

679 **S3 Appendix. Sensitivity analysis.**



## Enroll household contacts of influenza cases

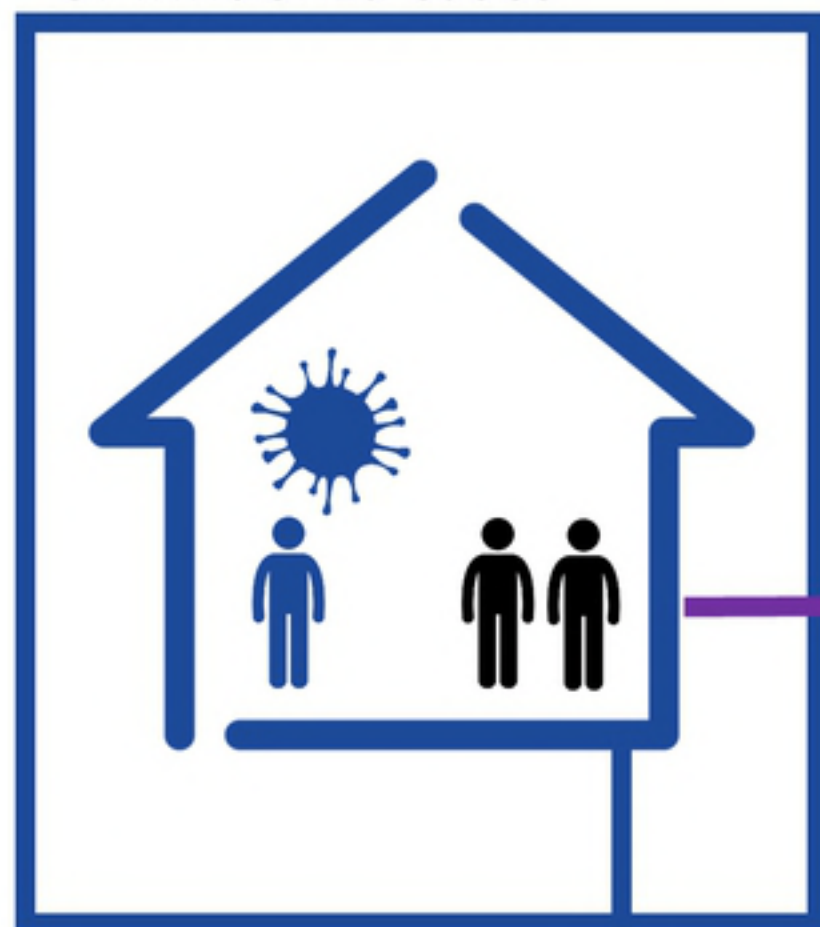

## Assess factors mediating influenza susceptibility

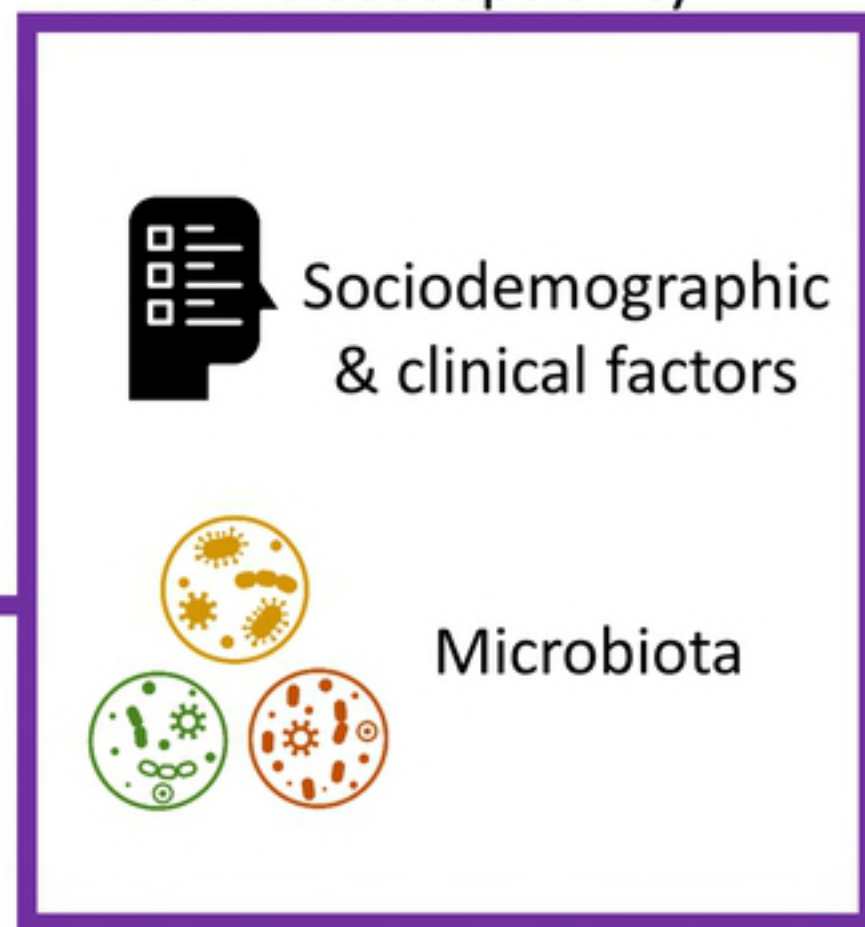

## Monitor for influenza infection

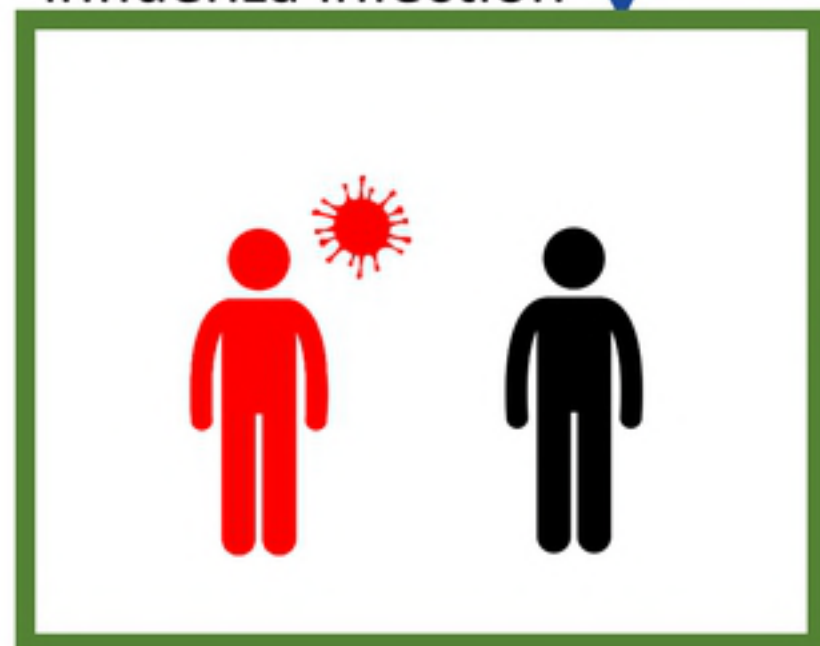

## Examine change in bacterial community structure

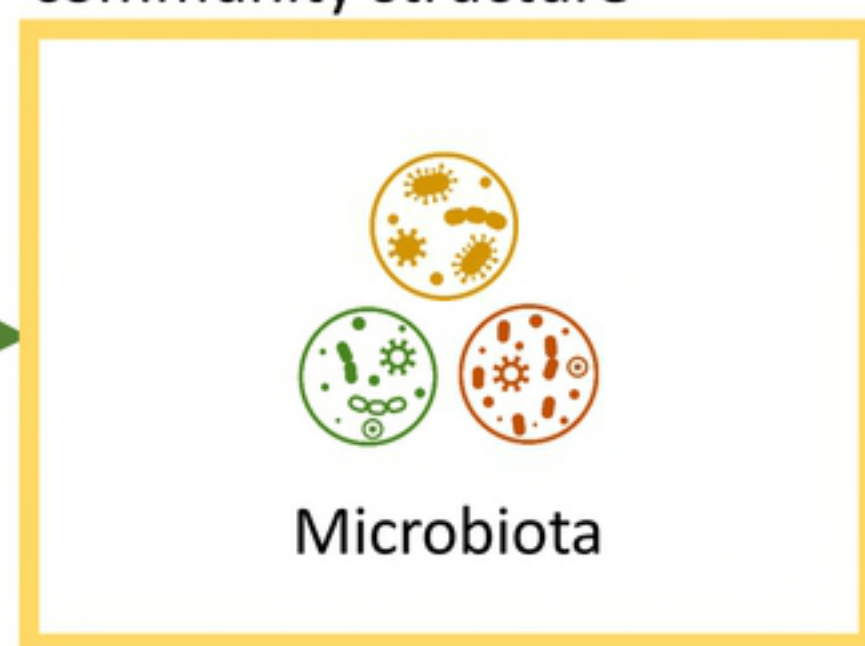

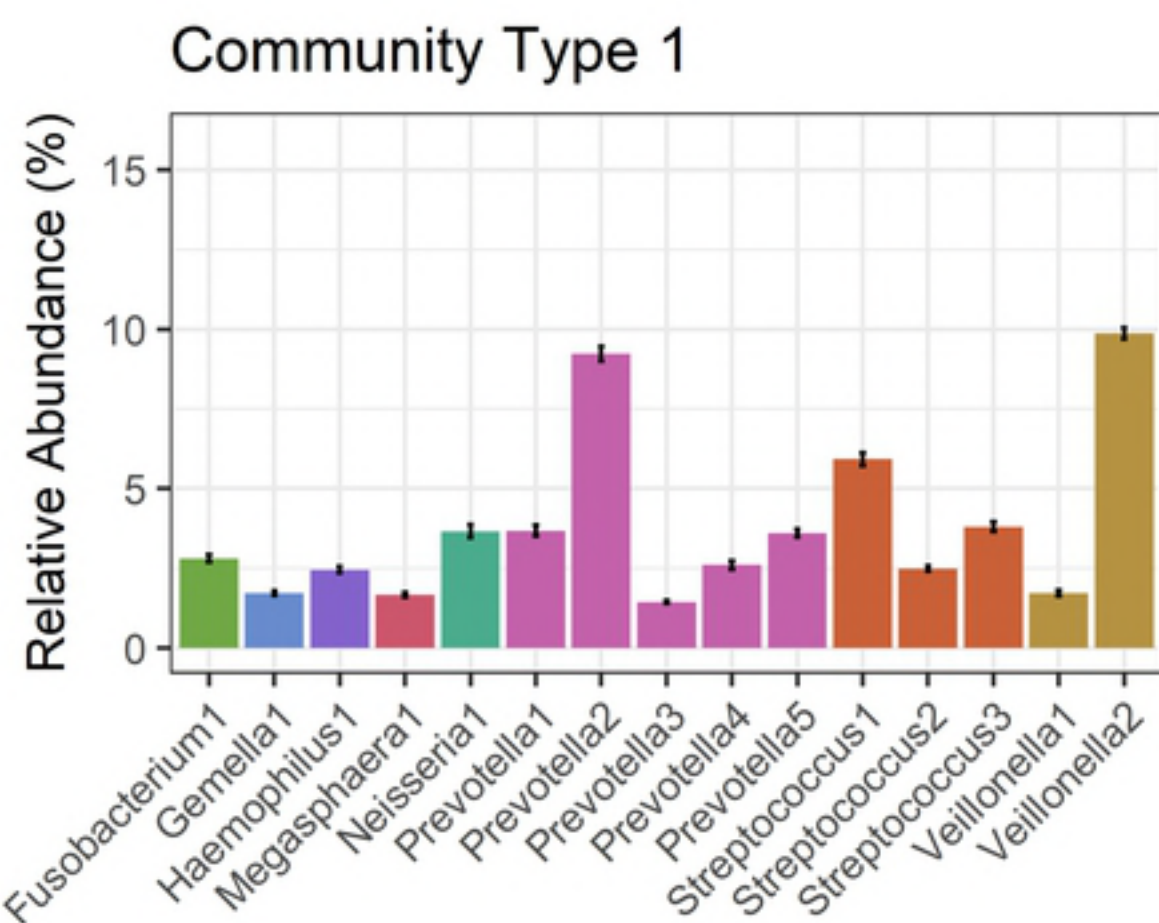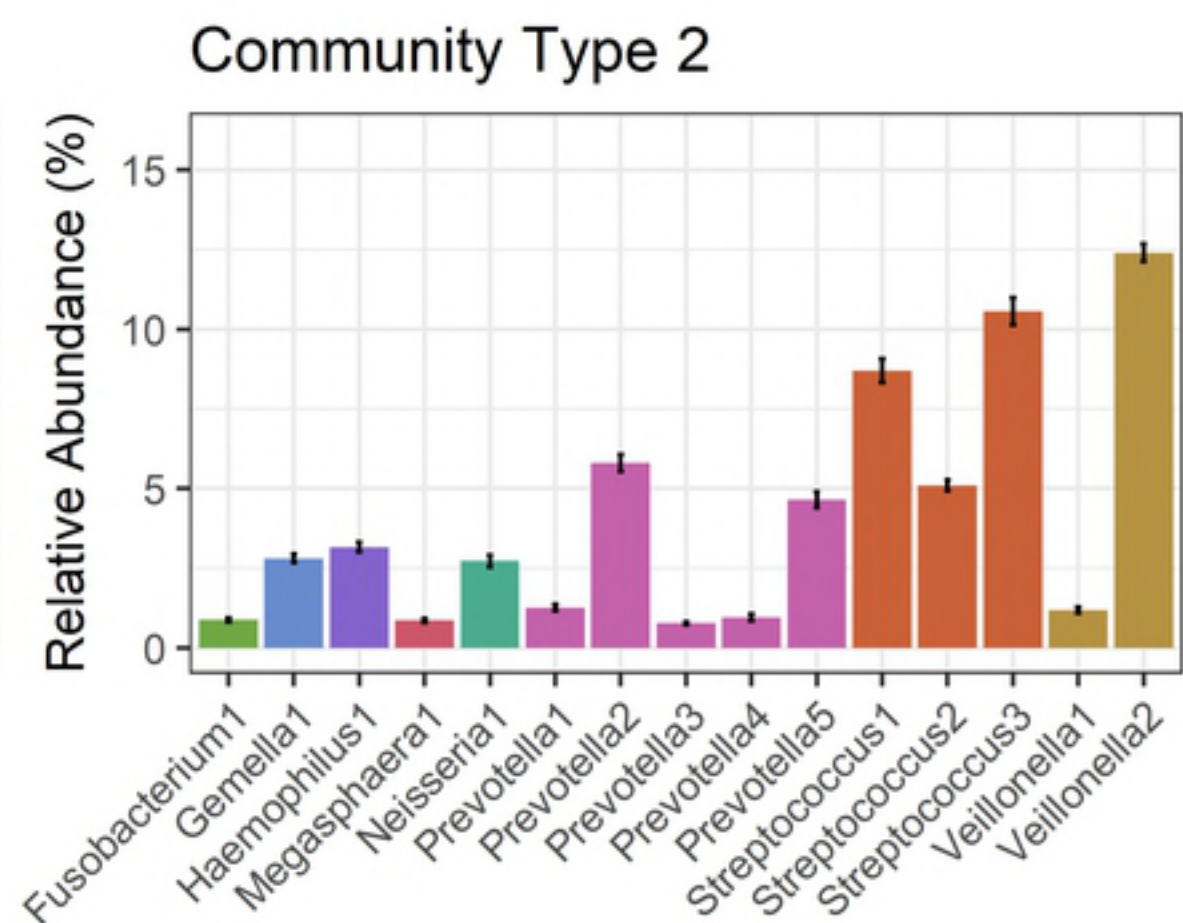

bioRxiv preprint doi: <https://doi.org/10.1101/372649>; this version posted July 19, 2018. The copyright holder for this preprint (which was not certified by peer review) is the author/funder, who has granted bioRxiv a license to display the preprint in perpetuity. It is made available under aCC-BY 4.0 International license.

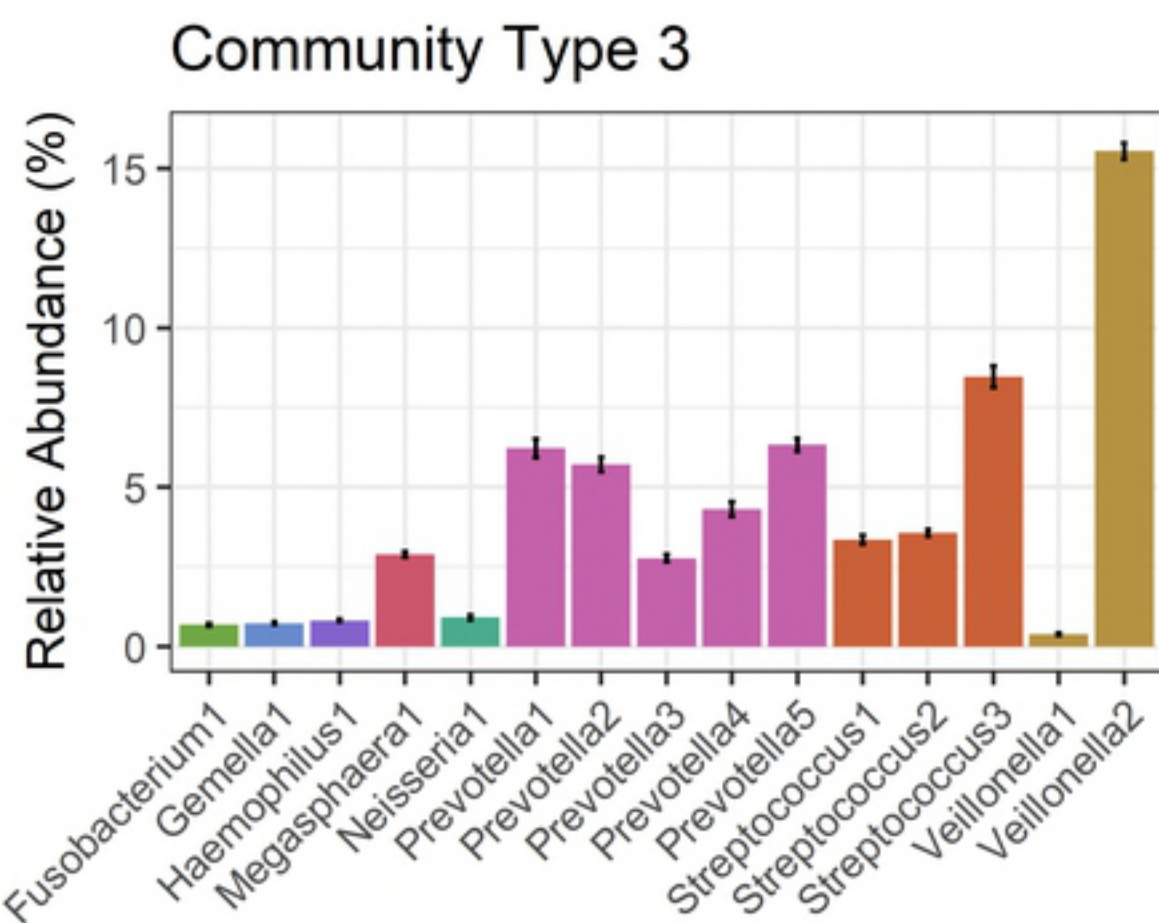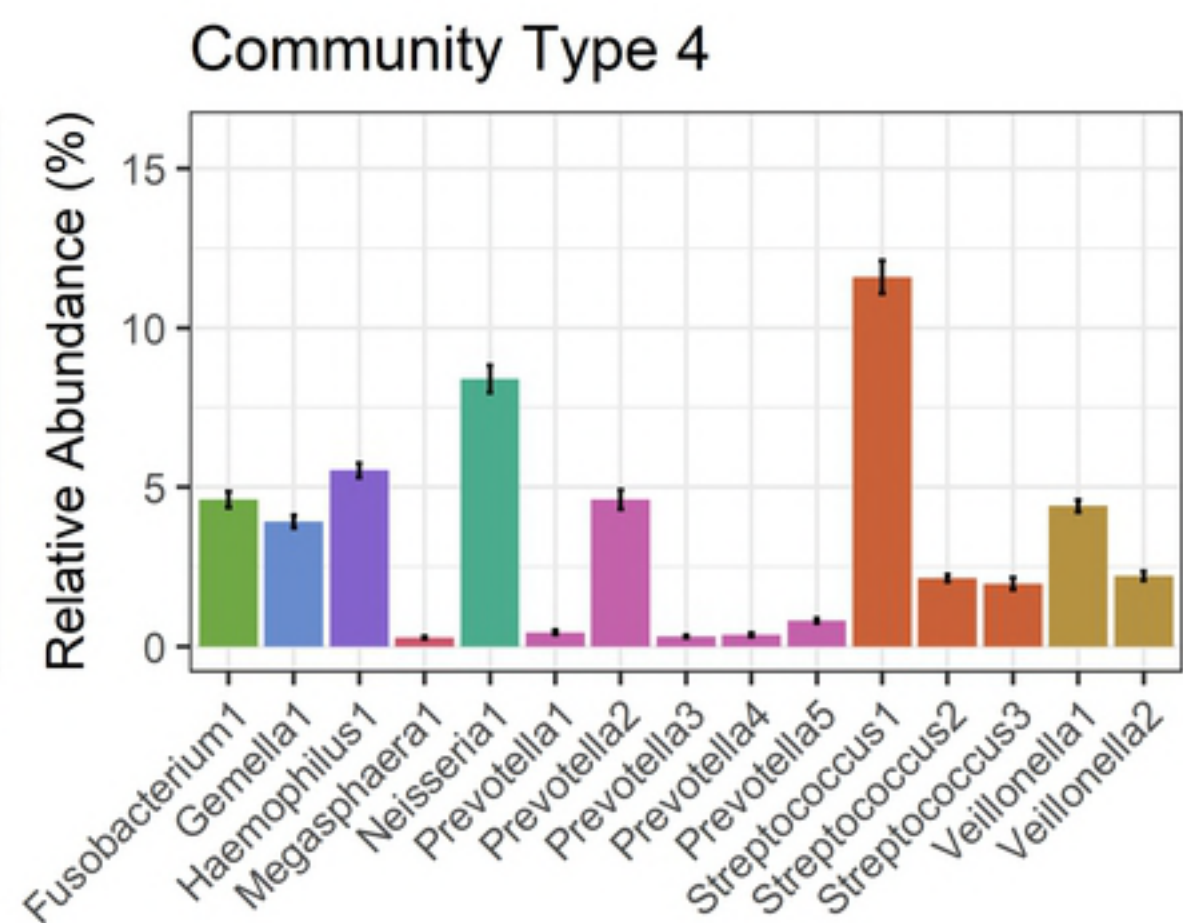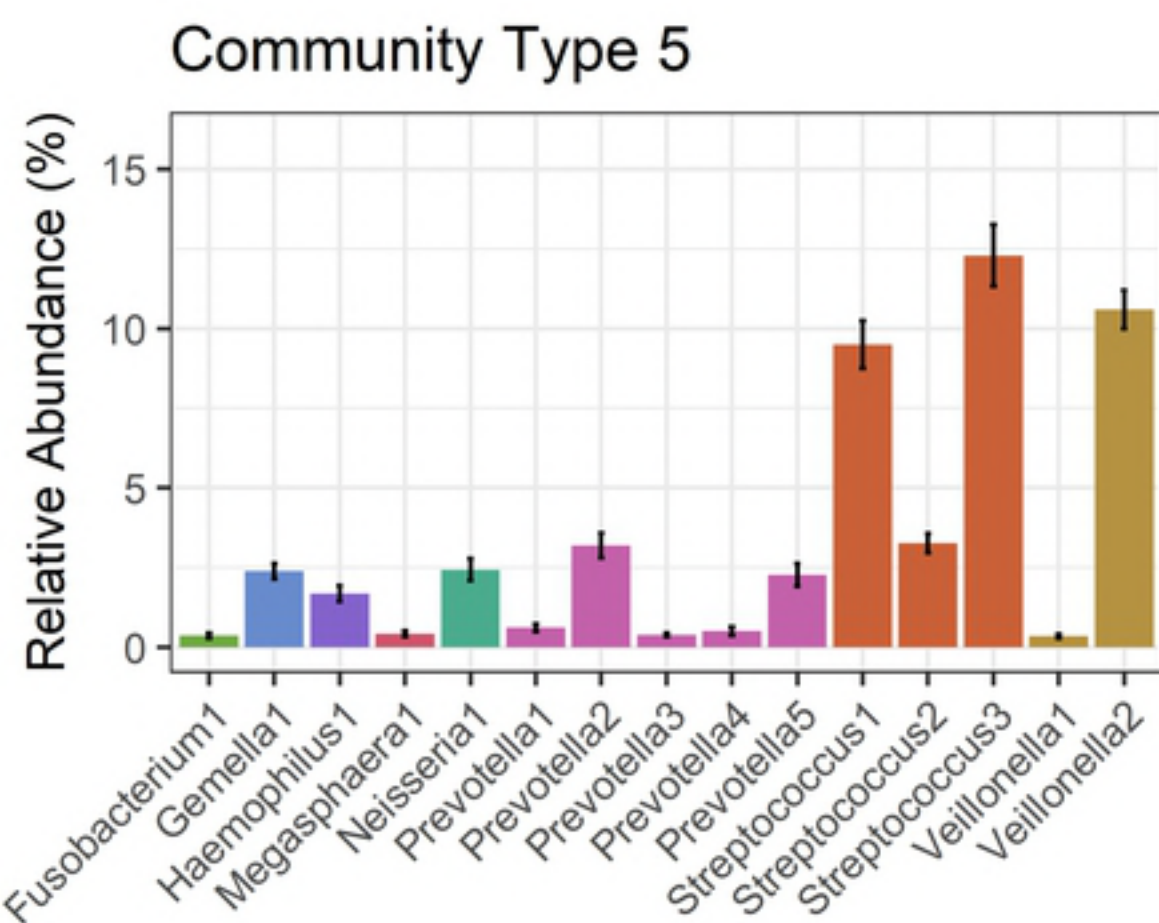



Secondary Attack Rate (%)

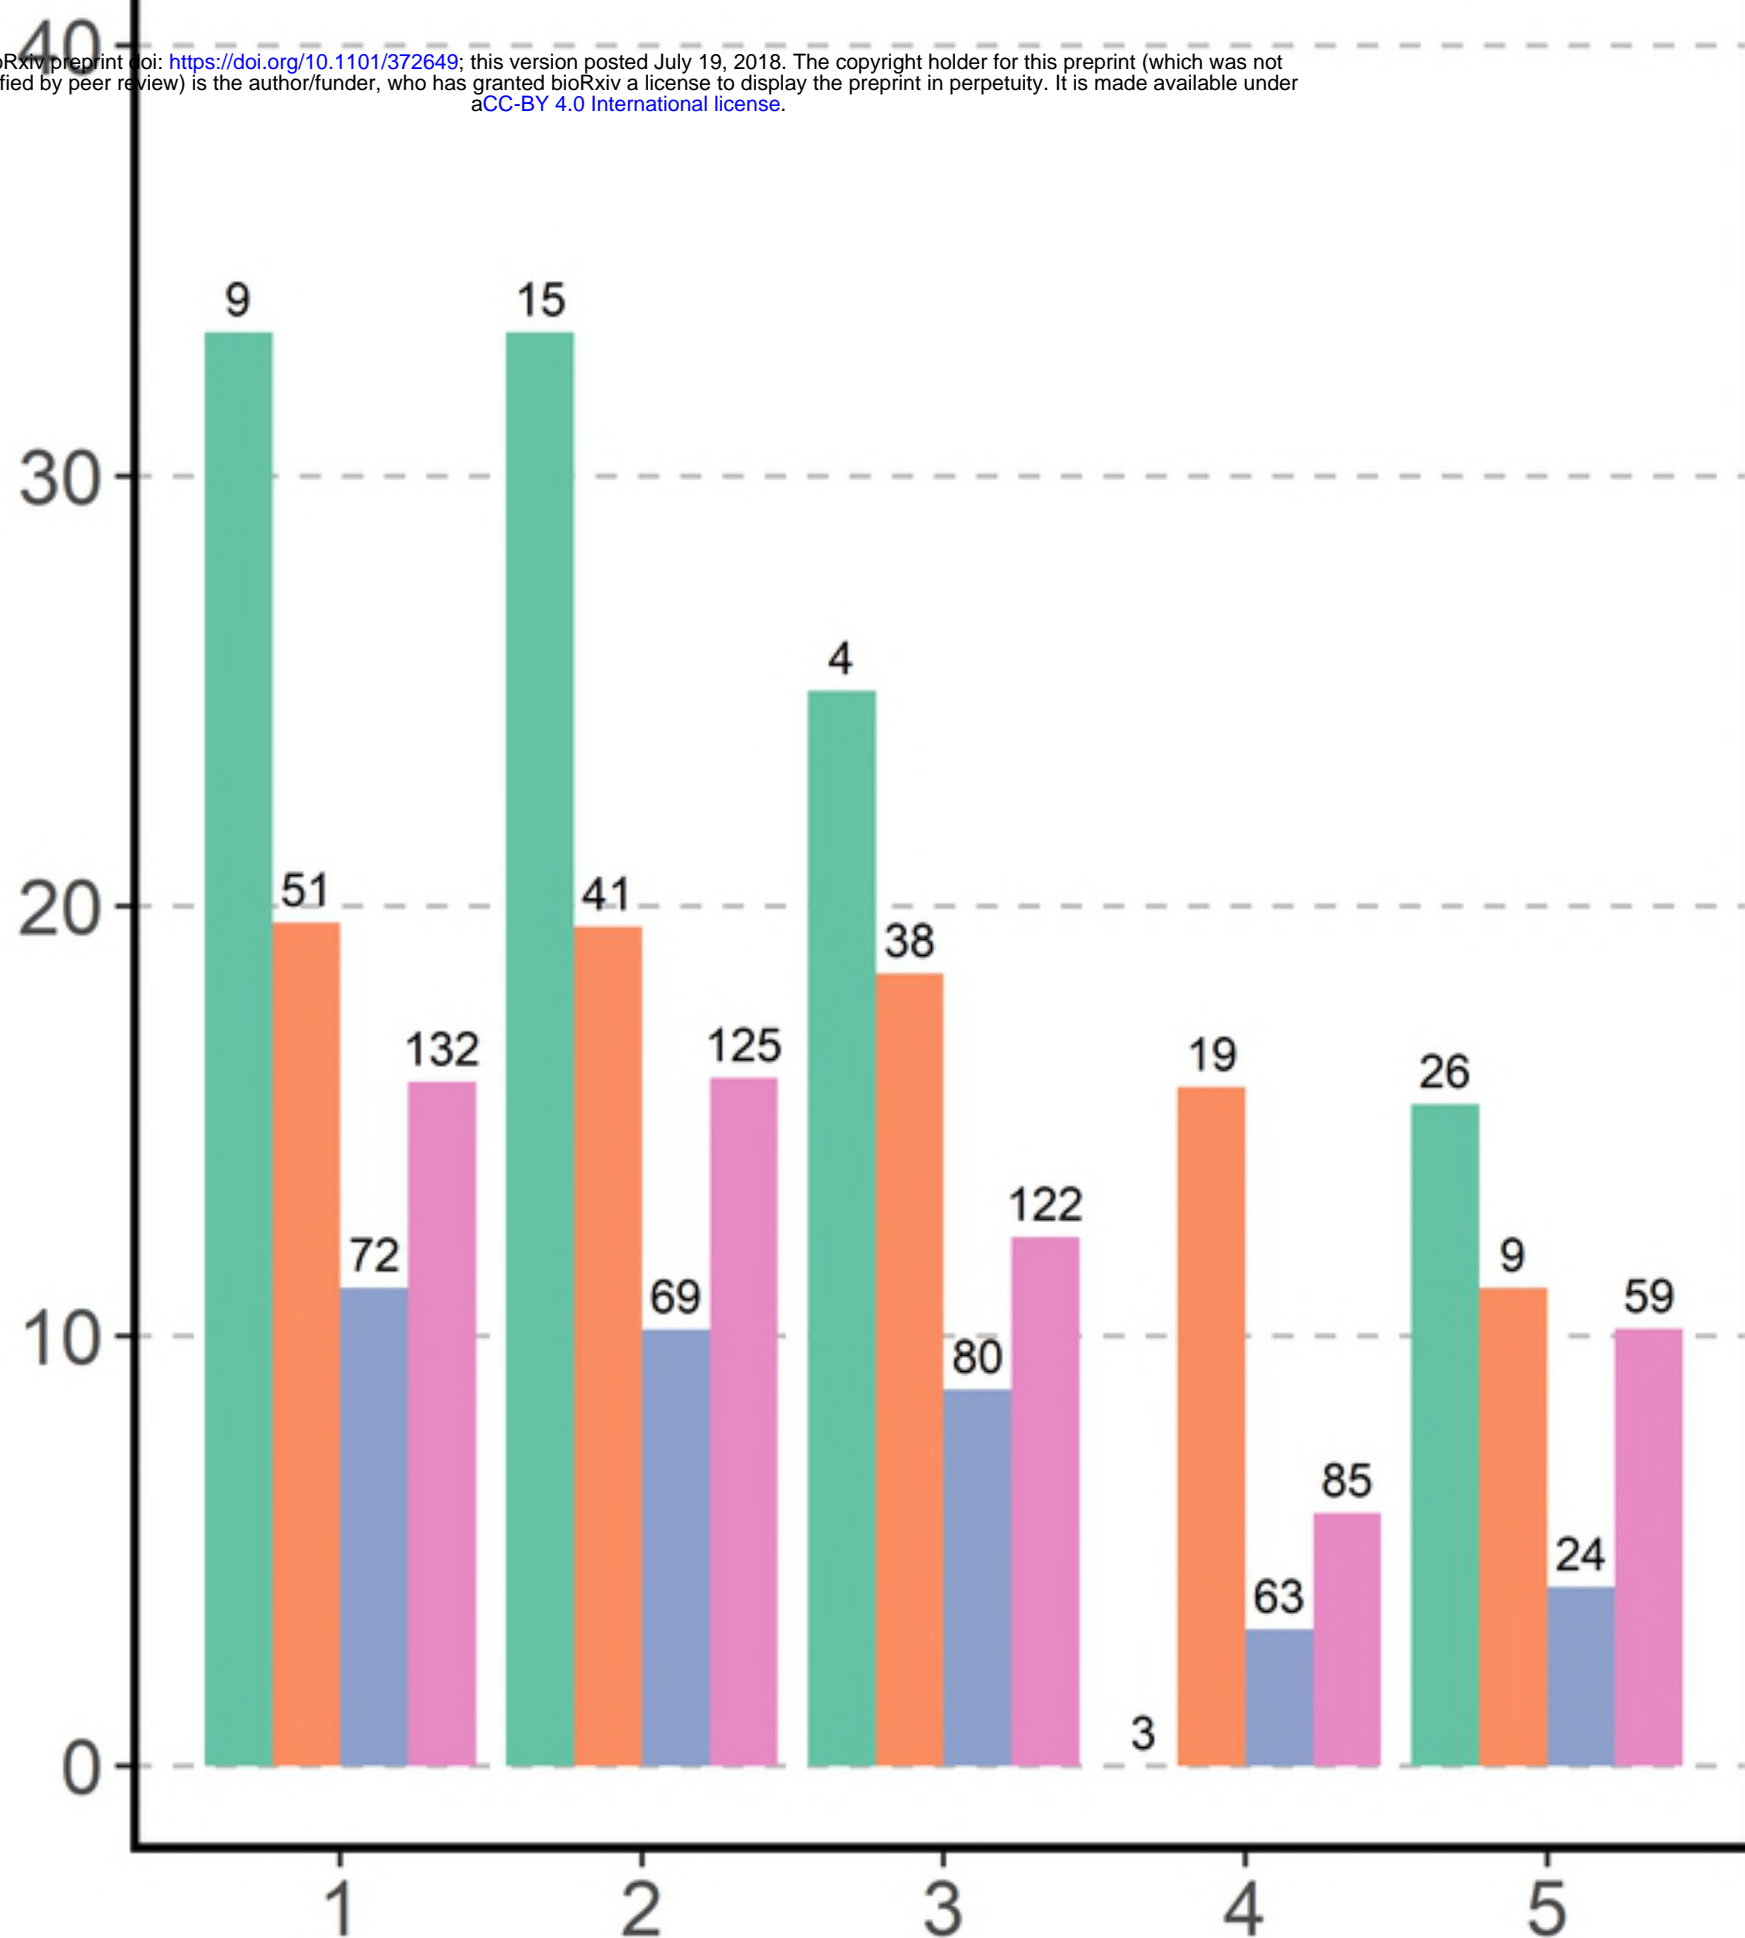

Age

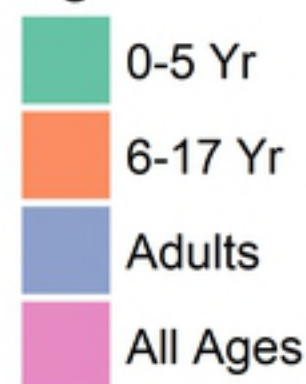

Community Type

| Characteristic      | OR (95% CI)        |
|---------------------|--------------------|
| Community type 2    | 1.08 (0.47, 2.49)  |
| Community type 3    | 0.97 (0.42, 2.27)  |
| Community type 3    | 0.26 (0.07, 0.99)  |
| Community type 3    | 0.42 (0.12, 1.43)  |
| Age 0-5 yr          | 4.66 (1.62, 13.37) |
| Age 6-17 yr         | 2.92 (1.47, 5.80)  |
| Smoker in household | 0.82 (0.39, 1.72)  |
| Household crowding  | 1.45 (0.67, 3.15)  |

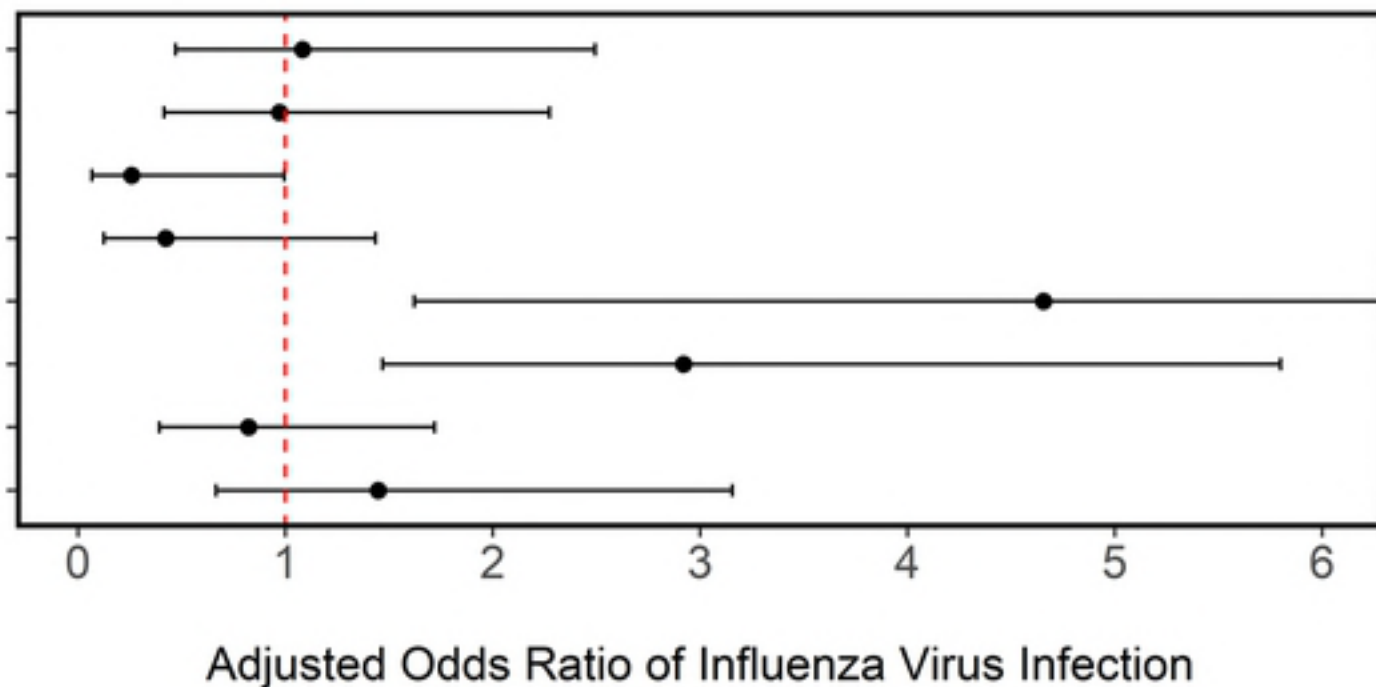

# A Among all household contacts, by influenza case status

No Influenza Infection (n=443)

Secondary Cases (n=70)

bioRxiv preprint doi: <https://doi.org/10.1101/372649>; this version posted July 19, 2018. The copyright holder for this preprint (which was not certified by peer review) is the author/funder, who has granted bioRxiv a license to display the preprint in perpetuity. It is made available under aCC-BY 4.0 International license.

# B Among household contacts with no influenza virus infection during follow up, by age group

0-5 Years (n=44)

6-17 Years (n=125)

Adults (n=274)

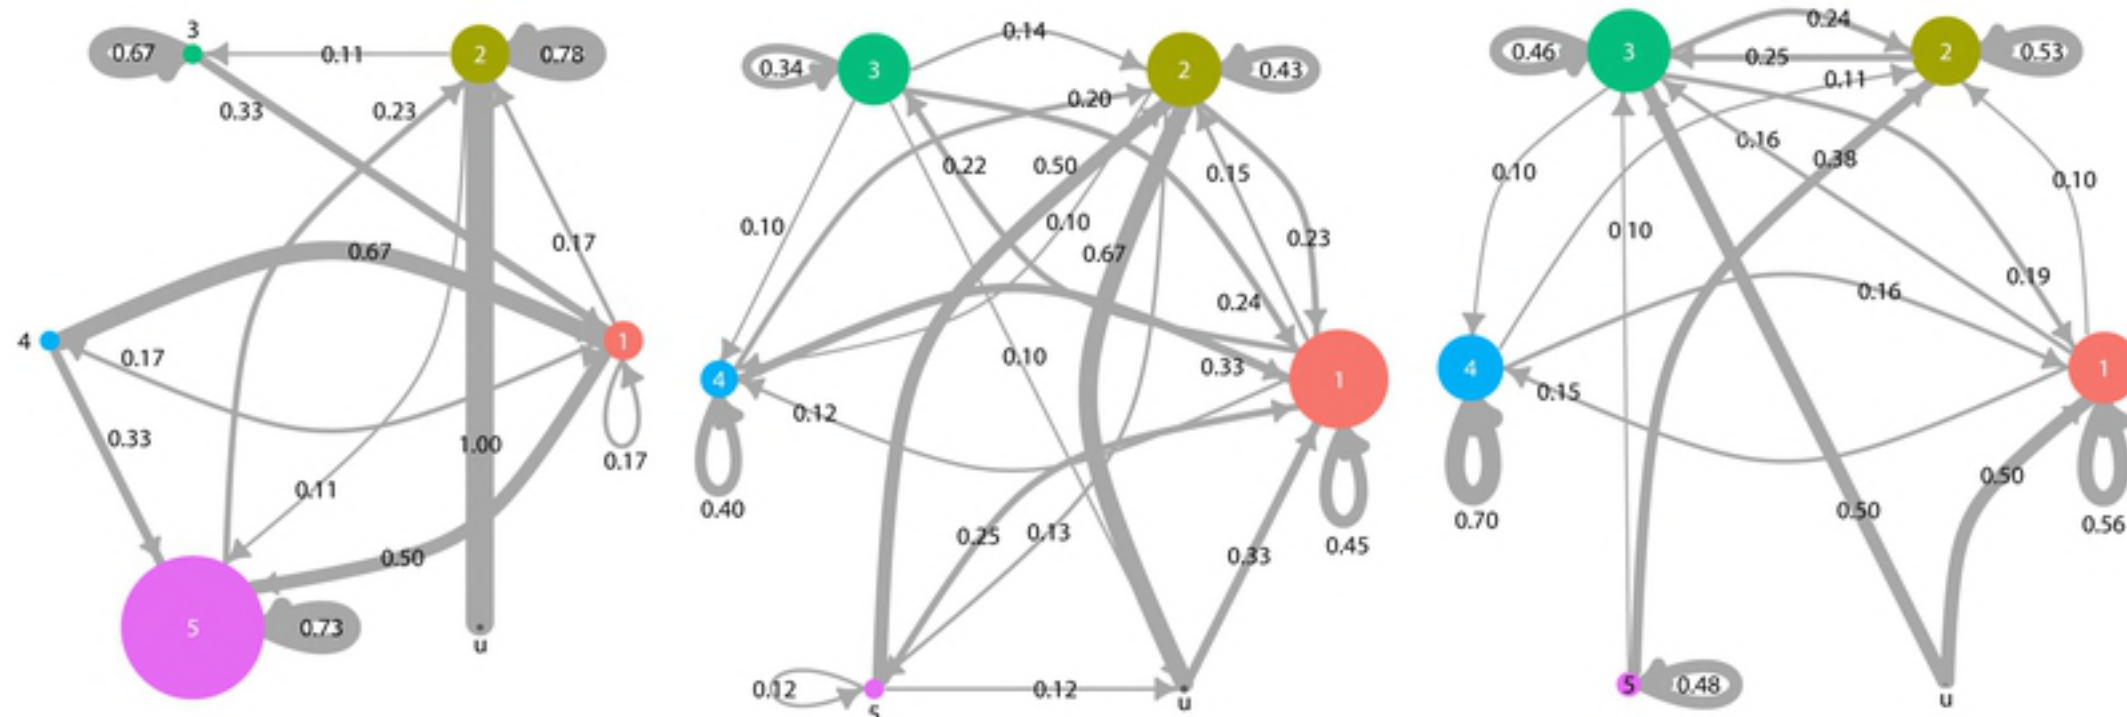

# C Among secondary cases, by age group

0-5 Years (n=15)

6-17 Years (n=29)

Adults (n=26)

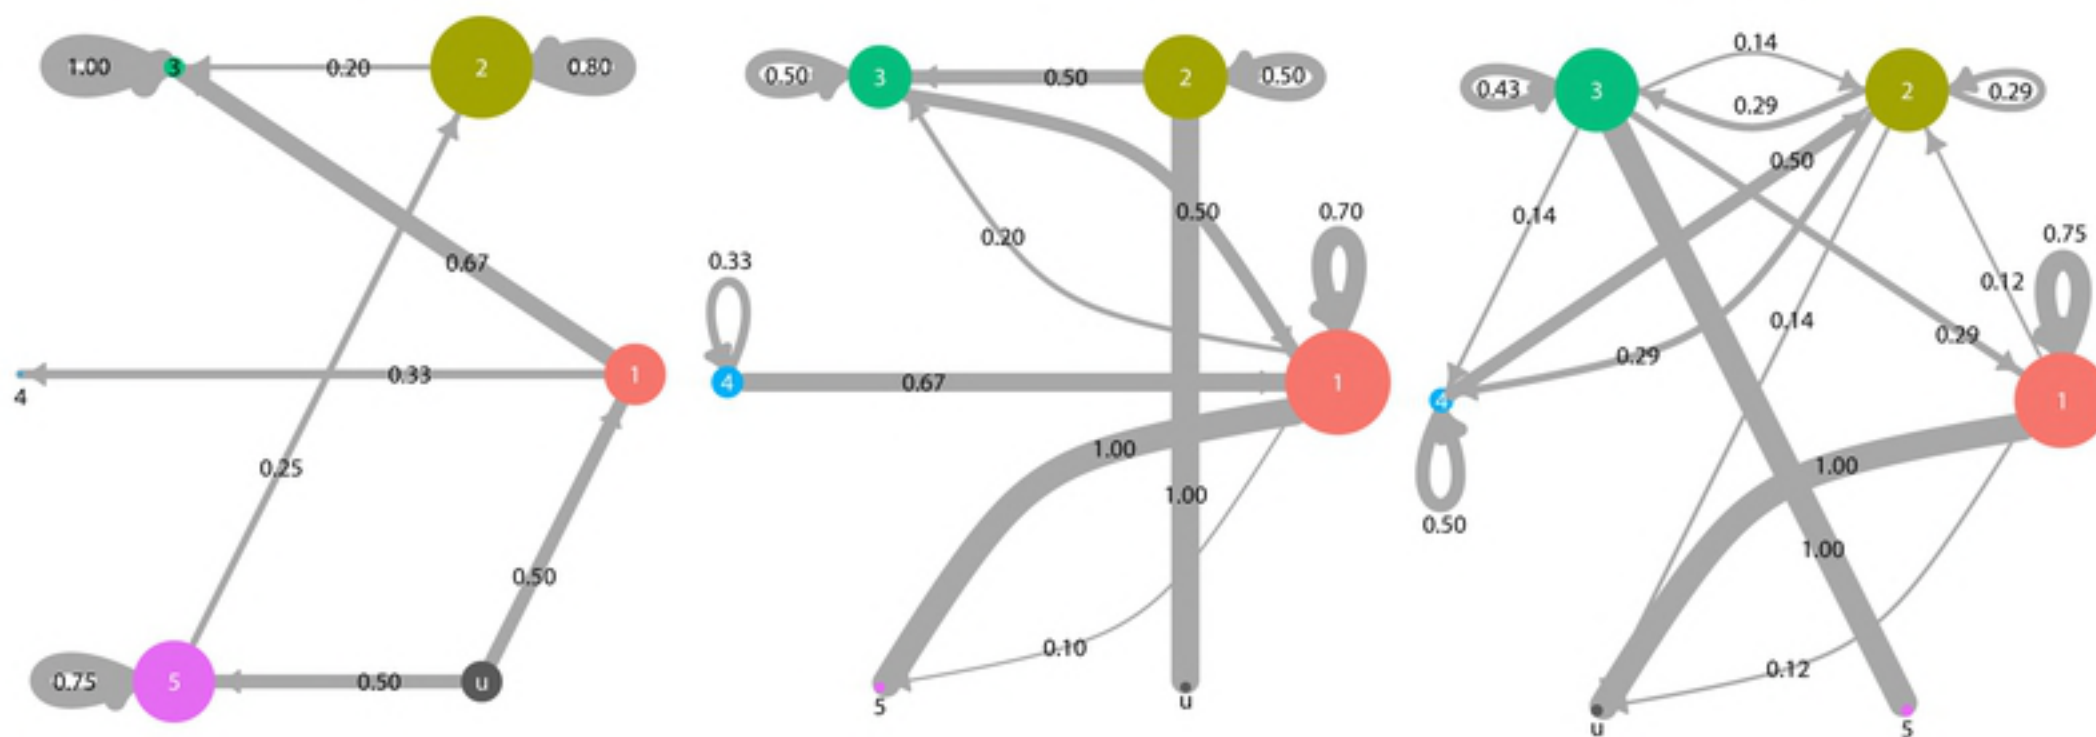

| Characteristic      | OR (95% CI)       |
|---------------------|-------------------|
| Influenza infection | 0.78 (0.44, 1.40) |
| Community type 2    | 1.08 (0.63, 1.87) |
| Community type 3    | 1.56 (0.90, 2.70) |
| Community type 4    | 0.78 (0.42, 1.46) |
| Community type 5    | 1.27 (0.61, 2.62) |
| Age 0-5 yr          | 0.76 (0.37, 1.55) |
| Age 6-17 yr         | 1.67 (1.07, 2.60) |
| Smoker in household | 0.86 (0.59, 1.27) |
| Household crowding  | 0.97 (0.64, 1.47) |

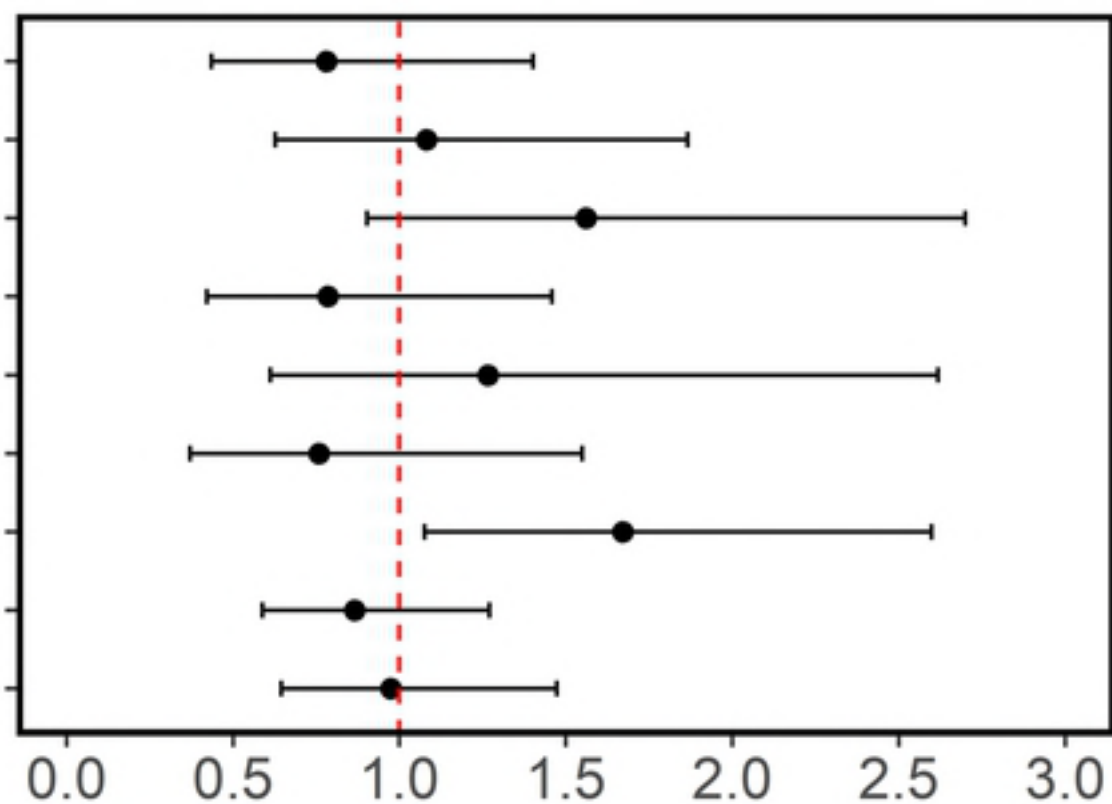

Adjusted Odds Ratio of Community Change
